# Supplementary material for: Preparation of BaSnO3 and Ba0.96La0.04SnO3 by reactive core–shell precursor: formation process, CO sensitivity, electronic and optical properties analysis
Source: Royal Society of Chemistry journal article supplement (doi:10.1039/c6ra02207c), 2016-01-01
Supplement: c6ra02207c1.pdf [file c6ra02207c1.pdf]

**Supporting Information for “Preparation of BaSnO<sub>3</sub> and Ba<sub>0.96</sub>La<sub>0.04</sub>SnO<sub>3</sub> by reactive core-shell precursor: formation process, CO sensitivity, electronic and optical properties analysis”**

Chuande Huang,<sup>ab</sup> Xiaodong Wang,<sup>\*a</sup> Xueyan Wang,<sup>c</sup> Xin liu,<sup>a</sup> Quan Shi,<sup>a</sup> Xiaoli Pan<sup>a</sup> and Xiaogan Li<sup>c</sup>

<sup>a</sup>Dalian Institute of Chemical Physics, Chinese Academy of Sciences, Dalian 116023, China

<sup>b</sup>University of Chinese Academy of Sciences, Beijing 100049, China

<sup>c</sup>School of Electronic Science and Technology, Institute for Sensing Technologies, Dalian University of Technology, Dalian 116024, China

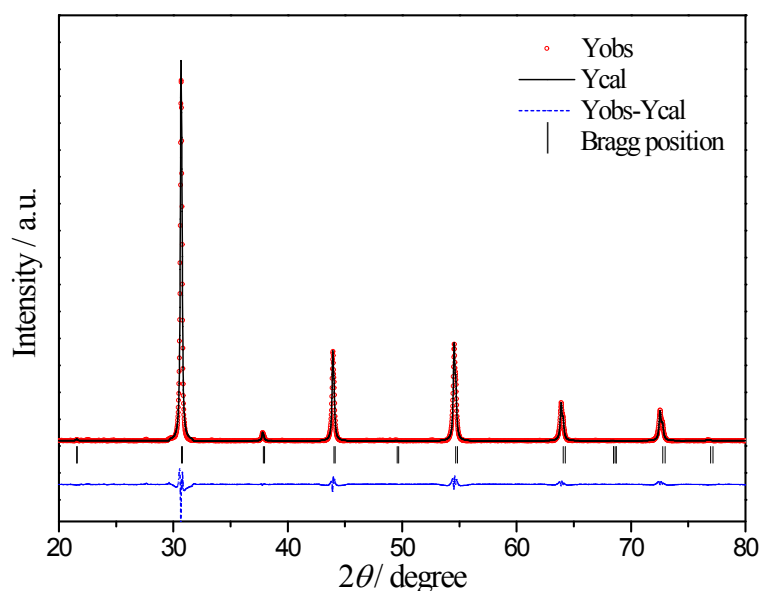

Fig. S1 Observed (points) and calculated (continuous line) X-ray Rietveld refined patterns of BaSnO<sub>3</sub>-800.

Table S1. Cationic compositions, lattice parameter and BET surface area of BaSnO<sub>3</sub> and Ba<sub>0.96</sub>La<sub>0.04</sub>SnO<sub>3</sub> samples calcined at 800 °C for 4h.

| Samples                                                | Real mole ratio                     | Unit cell parameter<br>/ Å | Volume<br>/ Å <sup>3</sup> | S / m <sup>2</sup> g <sup>-1</sup> |
|--------------------------------------------------------|-------------------------------------|----------------------------|----------------------------|------------------------------------|
| BaSnO <sub>3</sub>                                     | Ba / Sn = 1.008 / 1                 | 4.115(9)                   | 69.7                       | 7.5                                |
| Ba <sub>0.96</sub> La <sub>0.04</sub> SnO <sub>3</sub> | Ba / La / Sn = 0.955 /<br>0.036 / 1 | 4.117(6)                   | 69.8                       | 9.2                                |

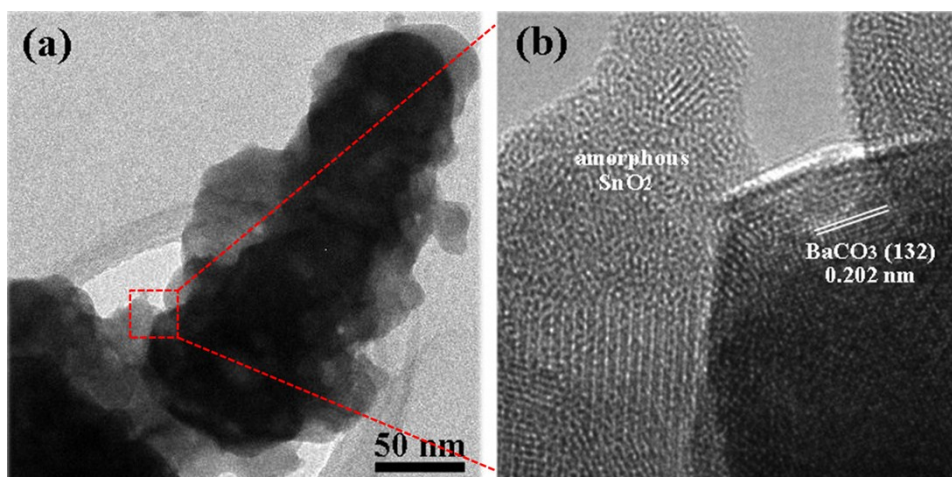

Fig. S2 (a) A typical TEM image of the nanorod in BaSnO<sub>3</sub>-120 precursor and (b) the magnified view of selected area in (a).
